# Supplementary material for: Fluorescence visualization of the molecular assembly processes during solvent evaporation via aggregation-induced emission in a cyanostilbene derivative
Source: Royal Society of Chemistry journal article supplement (doi:10.1039/c4ce01303d), 2014-01-01
Supplement: c4ce01303d1.pdf [file c4ce01303d1.pdf]

Electronic Supplementary Information:

**Fluorescence visualization of molecular assembly processes during solvent evaporation *via* aggregation-induced emission in a cyanostilbene derivative**

Fuyuki Ito\*, Jun-ichi Fujimori

Department of Chemistry, Faculty of Education, Shinshu University, 6-ro, Nishinagano, Nagano 380-8544, Japan

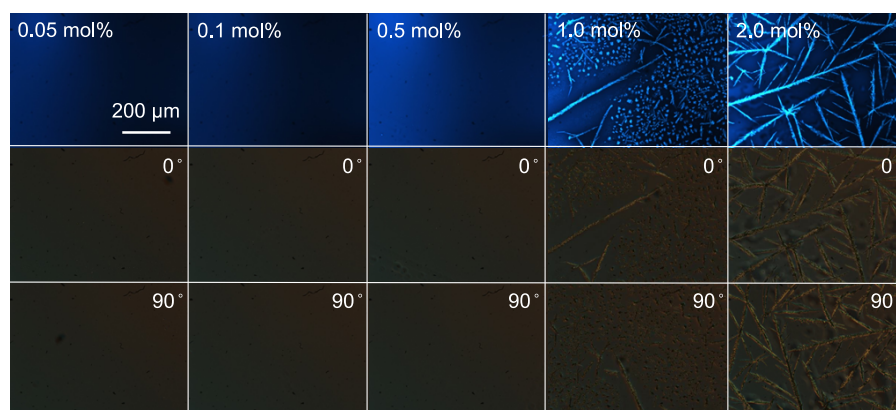

**Fig. ESI 1.** Fluorescence microscope image and polarization microscopy images under the crossed Nicol polarizers of CN-MBE in PMMA matrix as a function of concentration.

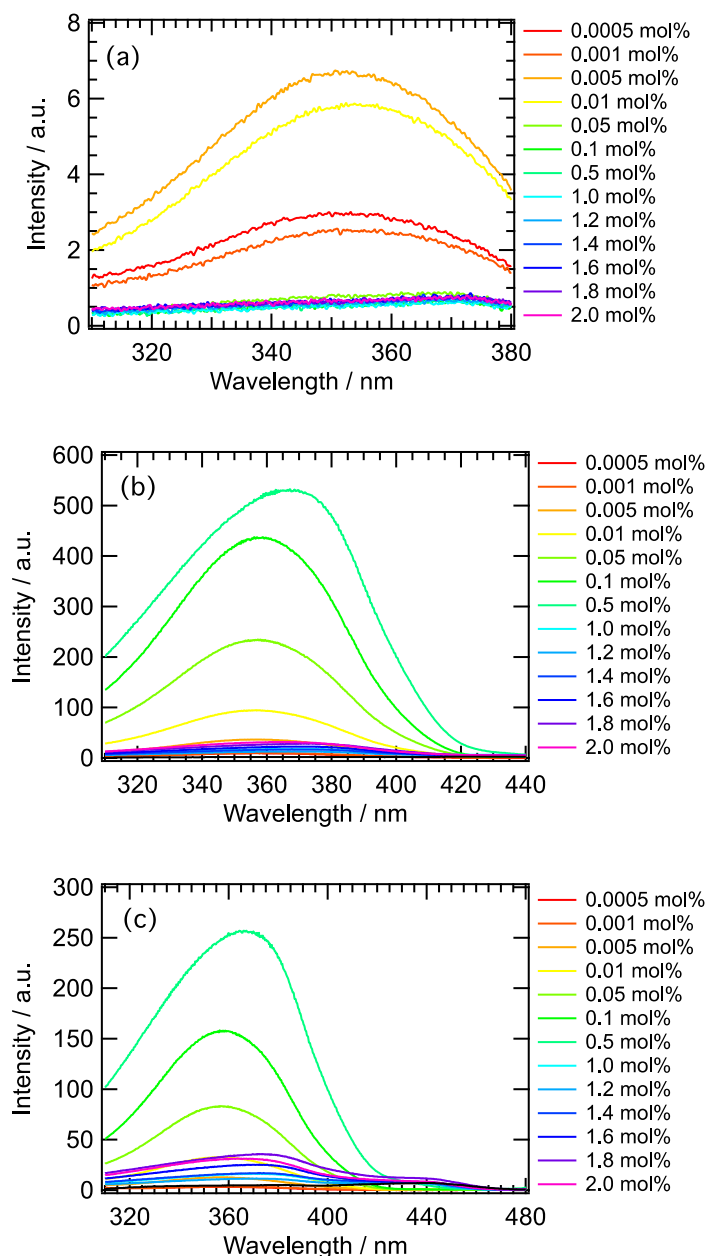

**Fig. ESI 2.** Fluorescence excitation spectra of CN-MBE in PMMA matrix monitored at (a) 400 nm, (b) 450 nm, and (c) 490 nm as a function of concentration.

Fig. ESI 2 shows the fluorescence excitation spectra of CN-MBE in PMMA matrix. Spectra for  $<0.1$  mol% CN-MBE in PMMA monitored at 400 nm, 450 nm, and 490 nm exhibited peaks at 355 nm. For concentrations  $>0.5$  mol%, the excitation peaks were observed at 370 nm, with shoulder at 350 nm. For emission monitored at 490 nm, an additional excitation peak was observed at 440 nm. Park *et al.* reported that the absorption bands at 342 nm, 366 nm, and 420 nm could be assigned to the twisted conformer, planar conformer, and J-aggregates of CN-MBE, respectively.<sup>14</sup> The broad excitation spectra at 355 nm for concentrations  $<0.1$  mol% is most likely a combination of the planar and twisted conformers that coexist in the films.

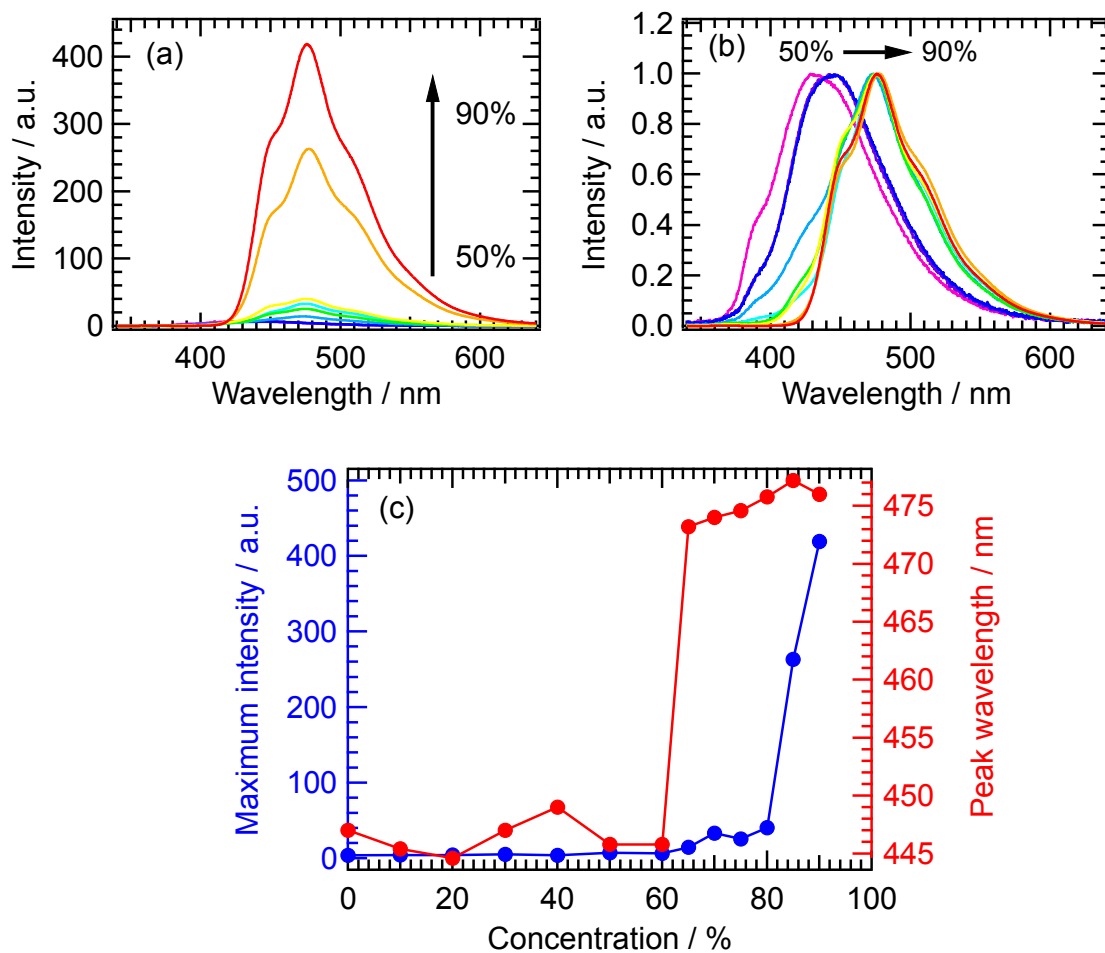

**Fig. ESI 3.** Fluorescence spectra of CN-MBE in THF/aqueous solution (a) and its normalized spectra at maximum intensity (b). (c) Water concentration dependence of maximum intensity and peak wavelength of the fluorescence from CN-MBE in THF/aqueous solution.

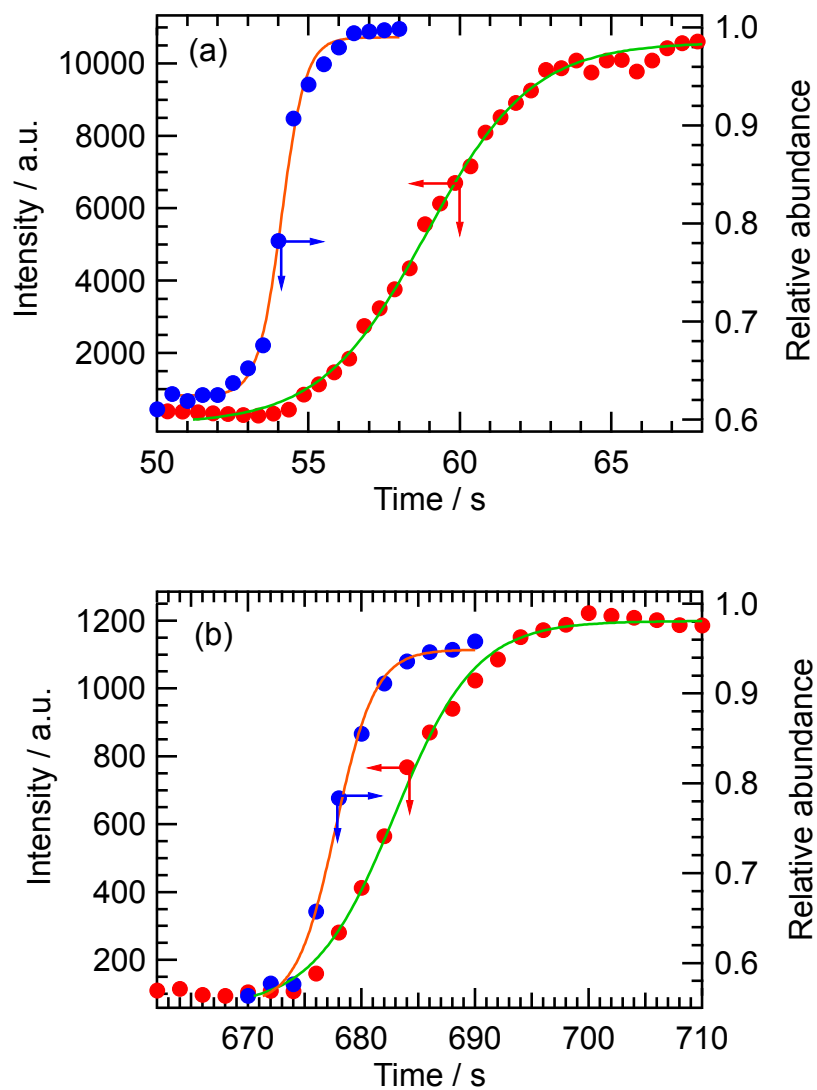

**Fig. ESI 4.** Change of fluorescence intensity (red circles) and relative abundance of J-aggregate (blue circles) of CN-MBE in dichloromethane (a) and chlorobenzene (b) as a function of time. The solid line is a curve fit based on the sigmoidal function.
